# Supplementary material for: Tuneable and efficient manufacturing of Li-ion battery separators using photopolymerization-induced phase separation
Source: Royal Society of Chemistry journal article supplement (doi:10.1039/d4ta03701d), 2024-01-01
Supplement: d4ta03701d1.pdf [file d4ta03701d1.pdf]

## Supporting information:

### **Tuneable and efficient manufacturing of Li-ion battery separators using photopolymerization-induced phase separation**

Samuel Emilsson,<sup>a</sup> Göran Lindbergh<sup>b</sup> and Mats Johansson<sup>a\*</sup>

---

<sup>a</sup> *Division of Coating Technology, Department of Fibre and Polymer Technology, KTH Royal Institute of Technology, SE-100 44 Stockholm, Sweden*

<sup>b</sup> *Division of Applied Electrochemistry, Department of Chemical Engineering, KTH Royal Institute of Technology, SE-100 44 Stockholm, Sweden*

**Table S1:** Chemical compositions (w/w) of all the thermoset membranes that were screened

| Sample          | TEG  | PC   | BMA  | TEMPIC |
|-----------------|------|------|------|--------|
| TEGPC-1-30%     | 0.15 | 0.15 | 0.7  | 0      |
| TEGPC-1-40%     | 0.2  | 0.2  | 0.6  | 0      |
| TEGPC-1-50%     | 0.25 | 0.25 | 0.5  | 0      |
| TEGPC-1-60%     | 0.3  | 0.3  | 0.4  | 0      |
| TEGPC-2-30%     | 0.2  | 0.1  | 0.7  | 0      |
| TEGPC-2-40%     | 0.27 | 0.13 | 0.6  | 0      |
| TEGPC-2-50%*    | 0.33 | 0.17 | 0.5  | 0      |
| TEGPC-2-60%     | 0.4  | 0.2  | 0.4  | 0      |
| TEGPC-4-30%     | 0.24 | 0.06 | 0.7  | 0      |
| TEGPC-4-40%     | 0.32 | 0.08 | 0.6  | 0      |
| TEGPC-4-50%     | 0.4  | 0.1  | 0.5  | 0      |
| TEGPC-4-60%     | 0.48 | 0.12 | 0.4  | 0      |
| TEGPC-4-40%-5T  | 0.4  | 0.1  | 0.57 | 0.03   |
| TEGPC-4-40%-10T | 0.4  | 0.1  | 0.54 | 0.06   |
| TEGPC-4-40%-20T | 0.4  | 0.1  | 0.48 | 0.12   |
| TEGPC-2-50%-10T | 0.33 | 0.17 | 0.45 | 0.05   |

\*This formulation was also investigated on glass substrates without a PVA coating – see Figure S2

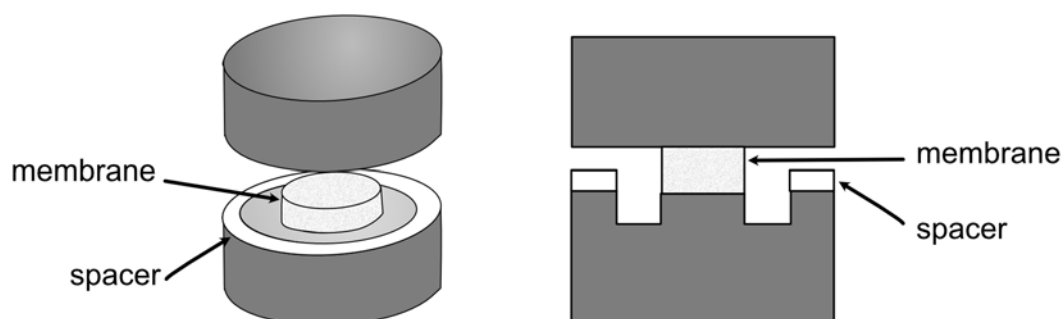

**Figure S1:** EIS setup for measuring effective conductivity through membranes. The figure shows the inner parts of the Swagelok cell.

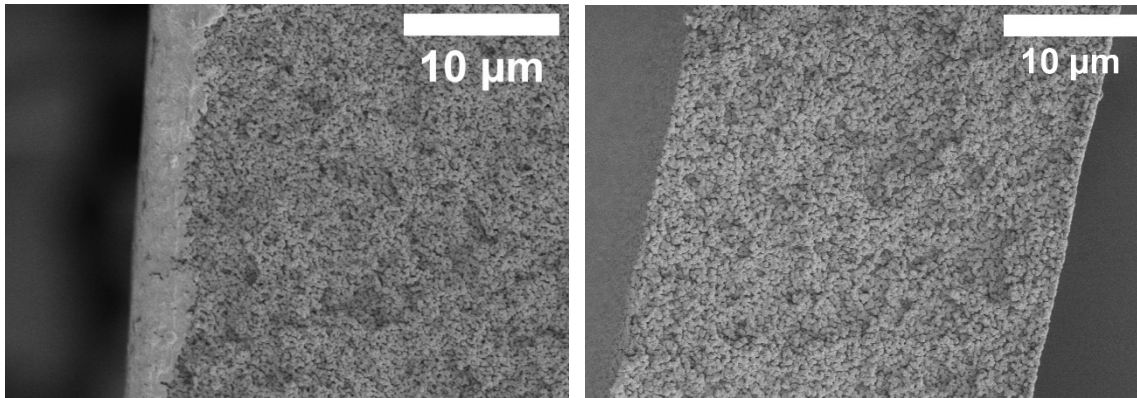

**Figure S2:** Left: SEM micrograph of cross-section of TEGPC-2-50% membrane containing a non-porous surface film manufactured using glass without a PVA coating. (3.5k magnification). Right: SEM micrograph of cross-section of full TEGPC-2-50% membrane manufactured using PVA coated glass, without any non-porous surface film (3k magnification)

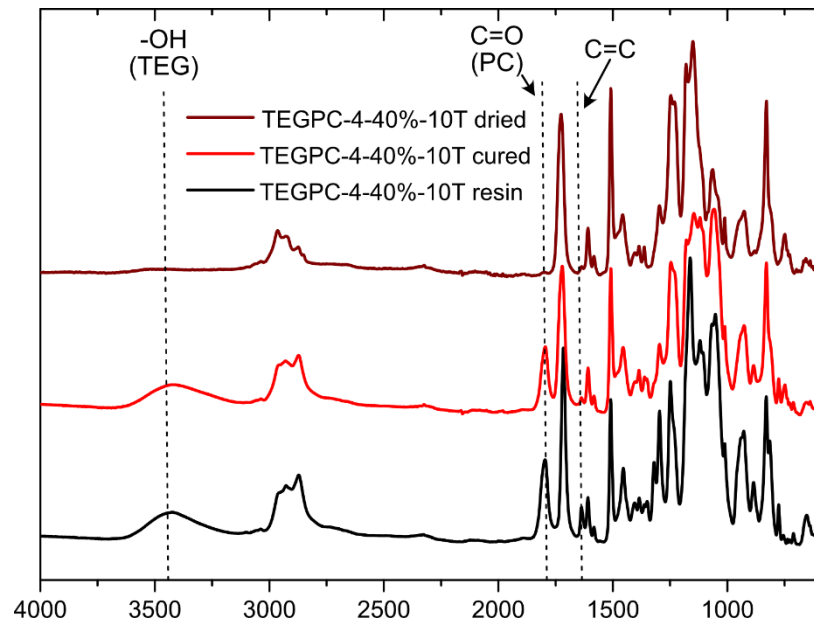

**Figure S3:** Full FTIR spectra of the formulation TEGPC-4-40% in the uncured resin state, the wet cured film and the cured dried film.

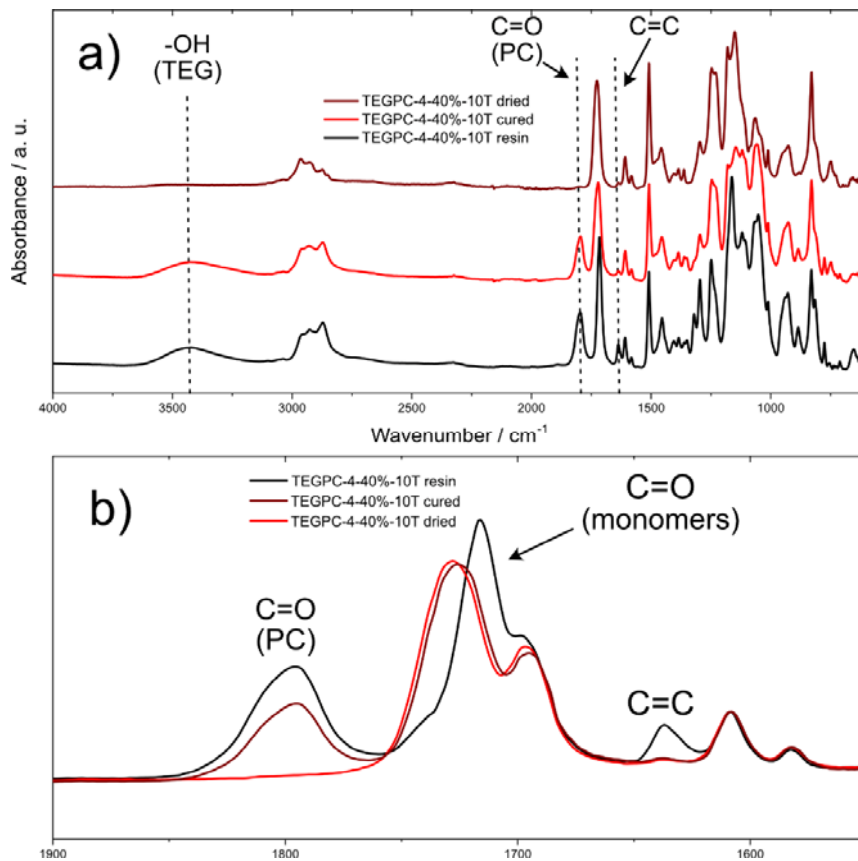

**Figure S4:** a) Full FTIR spectra of the formulation TEGPC-4-40%-10T in the uncured resin state, the wet cured film and the cured dried film and b) shows a selected region to follow the disappearance of the double bond stretch at  $1637\text{ cm}^{-1}$ .

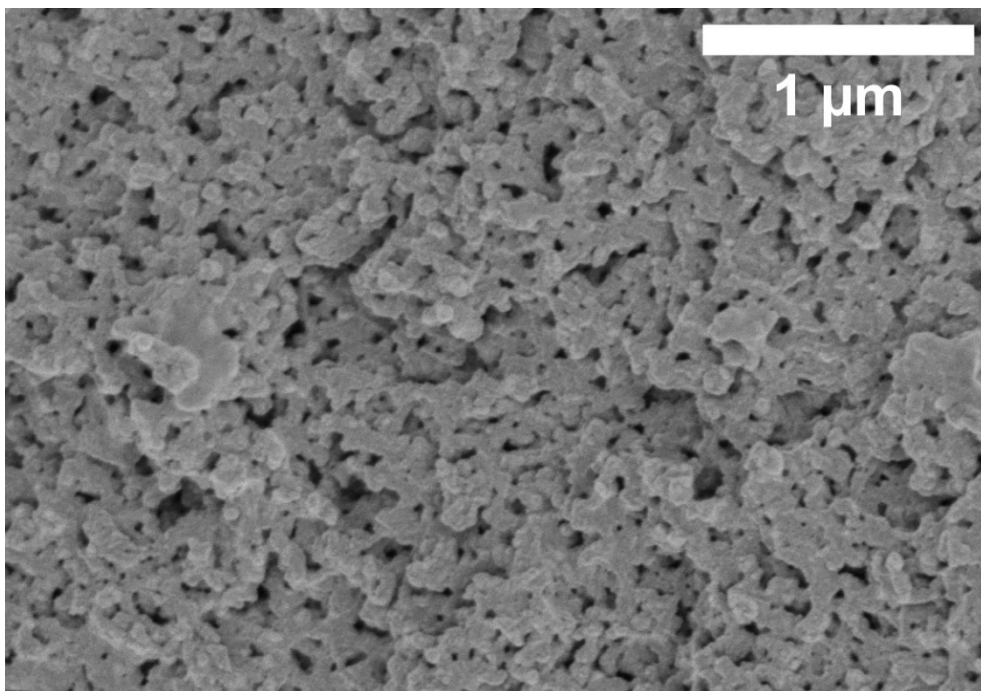

**Figure S5:** SEM micrograph of the cross-section of TEGPC-4-30% at 35,000 x magnification. This shows that a porous structure is obtain even at low porogen content (30wt%) when using a larger content of TEG.

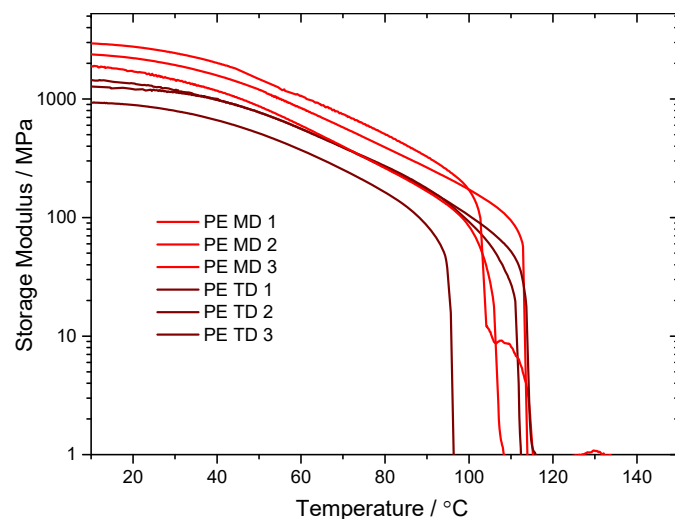

**Figure S6:** DMA thermograph of different runs of the PE references material showing a large spread in storage modulus and drop off temperature due to the low thickness (20  $\mu\text{m}$ ) of the material.

**Table S2:** Conductivity of TEGPC4-40% using different liquid electrolytes

| Sample                                        |      | Ionic conductivity / $\text{mS cm}^{-1}$ (25 °C) | $N_M$ |
|-----------------------------------------------|------|--------------------------------------------------|-------|
| TEGPC41-40% w/<br>EC/DEC 1M LiPF <sub>6</sub> | Film | 0.99                                             | 4.9   |
|                                               | LE   | 4.9                                              |       |
| TEGPC41-40% w/<br>EC/PC 1M LiTFSI             | Film | 0.87                                             | 4.9   |
|                                               | LE   | 4.3                                              |       |

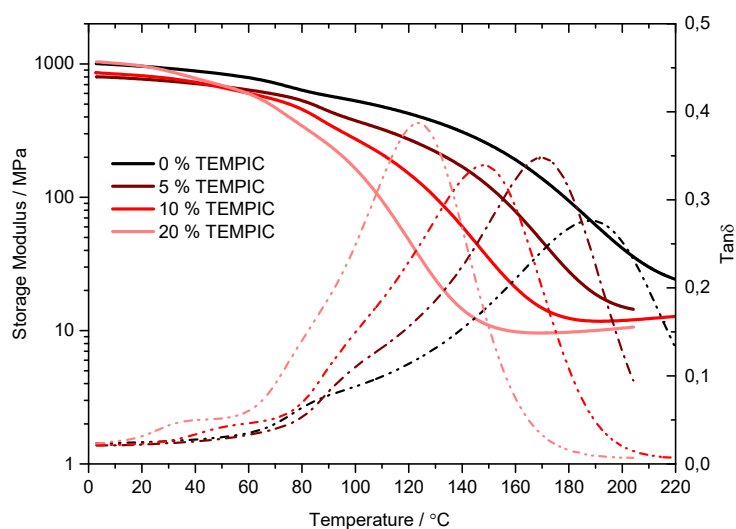

**Figure S7:** DMA thermograph of formulations of TEGPC4-40% with increasing contain of TEMPIC monomer. The  $\tan\delta$  peak indicates the  $T_g$  of the formulation.

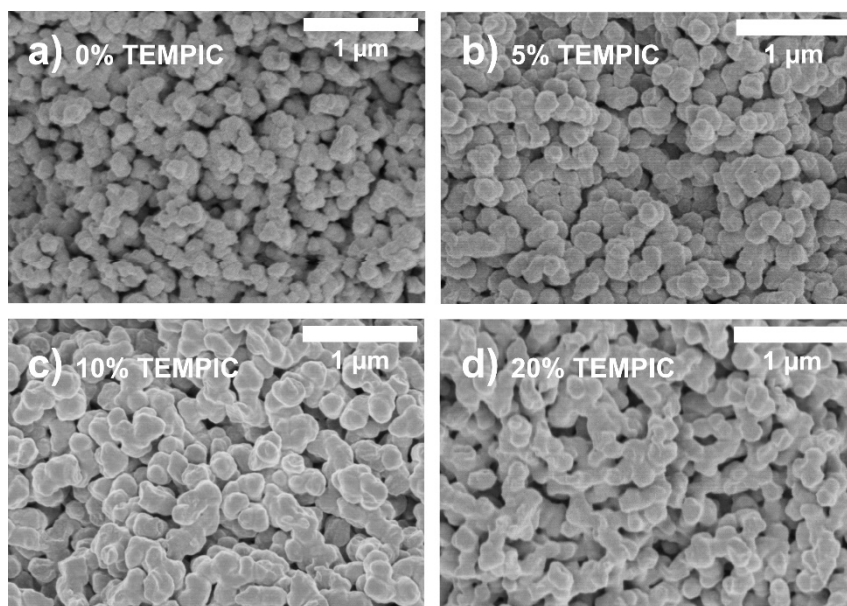

**Figure S8:** SEM micrographs of the cross-section of a) TEGPC-4-40% b) TEGPC-4-40%-5T c) TEGPC-4-40%-10T d) TEGPC-4-40%-20T at 35,000 x magnification

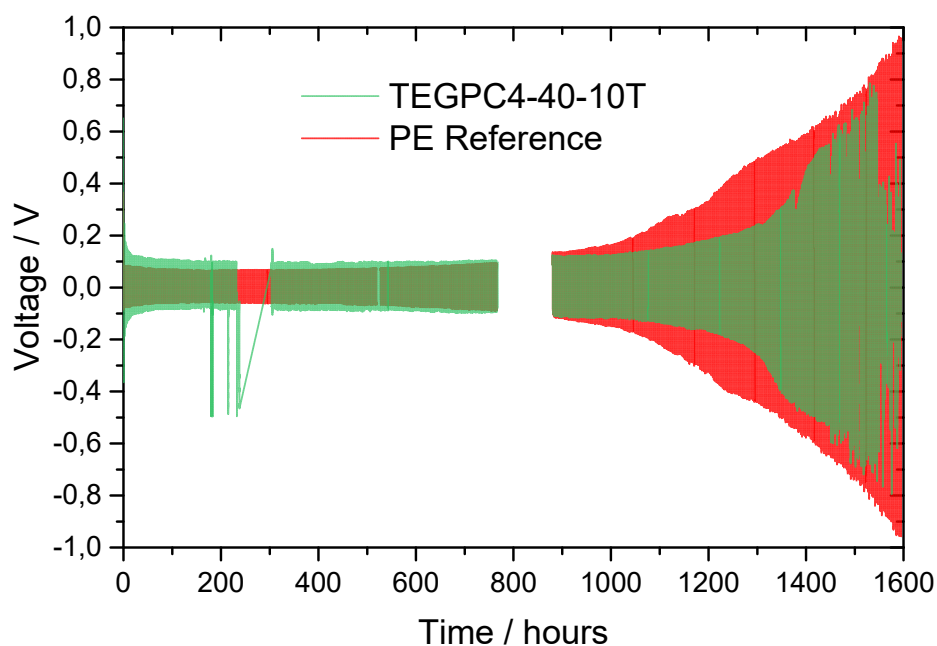

**Figure S9:** Voltage profiles of Li-Li symmetrical cell cycling at  $0.5 \text{ mA cm}^{-1}$  ( $0.5 \text{ mAh cm}^{-1}$ ) with PE reference and TEGPC-4-40%-10T for 1600 hours. Due to issues with the potentiostat, the data for hours 232-308 for TEGPC-4-40%-10T and hours 768-882 for TEGPC-4-40%-10T and PE reference was lost. Data from the applied current shows that it continued to cycle and age.

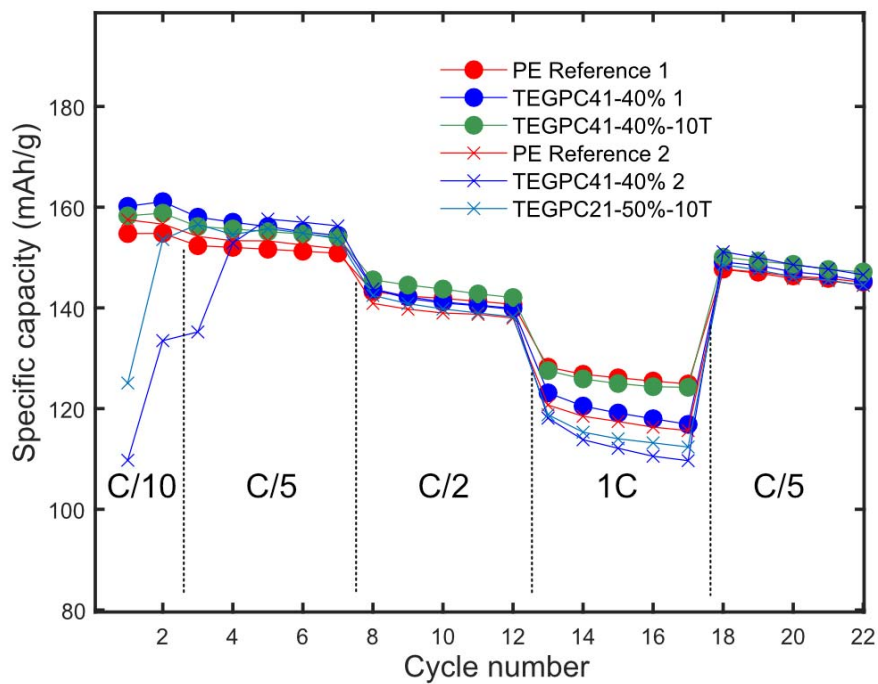

**Figure S10:** Capacity retention test for several different formulations of thermoset membranes and the PE reference. Cells were cycled between 2.6 and 3.9 V and two formation cycles at C/10 were used. Note that the batch to batch difference for the PE reference is rather large, related to varying glovebox conditions during study.
